# Supplementary material for: Diiron azadithiolate clusters supported on carbon nanotubes for efficient electrocatalytic proton reduction
Source: Royal Society of Chemistry journal article supplement (doi:10.1039/d0qi01415j), 2021-01-01
Supplement: d0qi01415j1.pdf [file d0qi01415j1.pdf]

Supporting Information for

**Diiron azadithiolate cluster supported on carbon nanotubes  
for efficient electrocatalytic proton reduction**

Pei-Hua Zhao,<sup>a,\*</sup> Jian-Rong Li,<sup>a</sup> Zhong-Yi Ma,<sup>a</sup> Hong-Fei Han,<sup>b</sup> Yong-Ping Qu,<sup>a</sup> and  
Bao-Ping Lu<sup>b,\*</sup>

<sup>a</sup>School of Materials Science and Engineering, North University of China, Taiyuan  
030051, P. R. China

<sup>b</sup>Department of Chemistry, Taiyuan Normal University, Jinzhong 030619, P. R. China

\*Corresponding author.

Email: zph2004@nuc.edu.cn (P.-H. Zhao), lubp@tynu.edu.cn (B.-P. Lu)

## Contents:

### I. Relevant spectroscopic and electrochemical data of 1-*f*-SWCNTs and 1

*p3. Fig. S1.* FT-IR spectrum (KBr disk) of hybrid 1-*f*-SWCNTs.

*p4. Fig. S2.* Raman spectra (RBM region) of 1-*f*-SWCNTs (black line), *f*-SWCNTs (green line), and *p*-SWCNTs (blue line) at an excitation wavelength of 785 nm.

*p5. Fig. S3.* Cyclic voltammetries of diiron compound **1** dissolved in MeCN (1.0 mM, black line) and loaded on GCE electrode (0.71 mg·cm<sup>-2</sup> loading, blue line) in 0.1 M *n*-Bu<sub>4</sub>NPF<sub>6</sub>/MeCN solution at a scan rate of 0.05 V s<sup>-1</sup>. Data in MeCN were recorded using a nonaqueous Ag/AgNO<sub>3</sub> (0.01 M in MeCN) reference electrode and are further referred to the normal hydrogen electrode (NHE) for comparison.

*p6. Fig. S4.* Controlled-potential electrolysis experiments of (a) hybrid 1-*f*-SWCNTs, (b) compound **1**, (c) pristine SWCNTs absorbed respectively on GCE electrodes with loading of 0.71 mg·cm<sup>-2</sup> and (d) bare GCE electrode at -0.90 V vs. Ag/AgCl (sat. KCl) in 0.2 N H<sub>2</sub>SO<sub>4</sub> solution.

### II. TON and TOF calculations of 1-*f*-SWCNTs and 1

*p7. Fig. S5.* (a) Cyclic voltammetry of hybrid 1-*f*-SWCNTs (loading of 0.71 mg cm<sup>-2</sup>) absorbed on GCE electrode in 0.1 M Na<sub>2</sub>SO<sub>4</sub>/H<sub>2</sub>O at a scan rate of 0.05 V s<sup>-1</sup>. (b) Controlled potential electrolysis of hybrid 1-*f*-SWCNTs (loading of 0.71 mg cm<sup>-2</sup>) absorbed on GCE electrode and bare GCE electrode at -0.9 V vs Ag/AgCl (sat. KCl) in 0.2 N H<sub>2</sub>SO<sub>4</sub> solution.

*p8. Fig. S6.* (a) Cyclic voltammetry of compound **1** (loading of 0.71 mg cm<sup>-2</sup>) absorbed on GCE electrode in 0.1 M Na<sub>2</sub>SO<sub>4</sub>/H<sub>2</sub>O at a scan rate of 0.05 V s<sup>-1</sup>. (b) Controlled potential electrolysis of compound **1** (loading of 0.71 mg cm<sup>-2</sup>) absorbed on GCE electrode and bare GCE electrode at -0.9 V vs Ag/AgCl (sat. KCl) in 0.2 N H<sub>2</sub>SO<sub>4</sub> solution.

### III. Crystallographic and spectroscopic data of compound 1

*p10. Table S1.* Details of crystallographic data and structure refinement for compound **1**

*p11. Fig. S7.* FT-IR spectrum (KBr disk) of compound **1**.

*p12. Fig. S8.* <sup>1</sup>H NMR (600 MHz, CDCl<sub>3</sub>, 25°C) spectrum of compound **1**.

*p13. Fig. S9.* <sup>13</sup>C{<sup>1</sup>H} NMR (150 MHz, CDCl<sub>3</sub>, 25°C) spectrum of compound **1**.

## I. Relevant spectroscopic and electrochemical data of 1-*f*-SWCNTs and 1

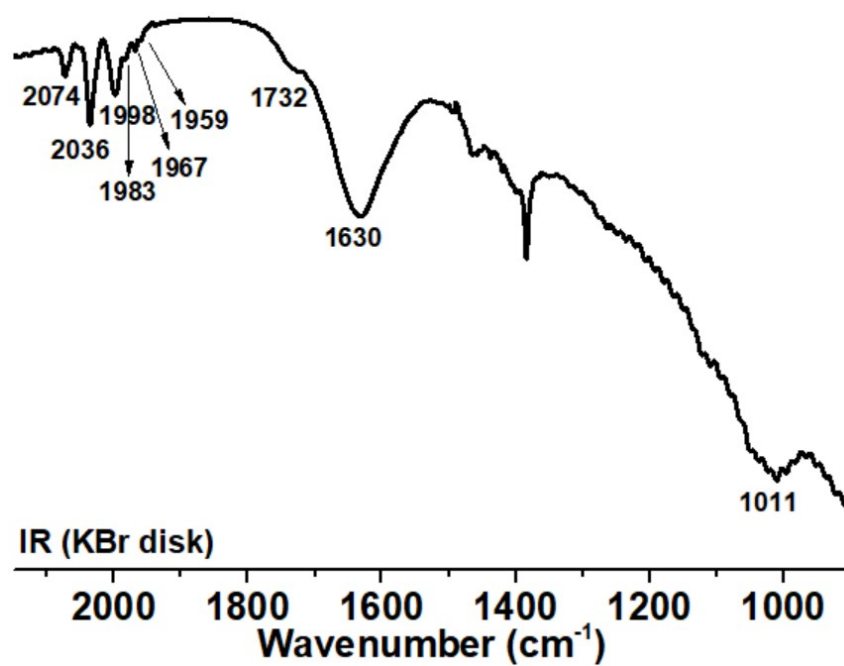

**Fig. S1.** FT-IR spectrum (KBr disk) of hybrid 1-*f*-SWCNTs.

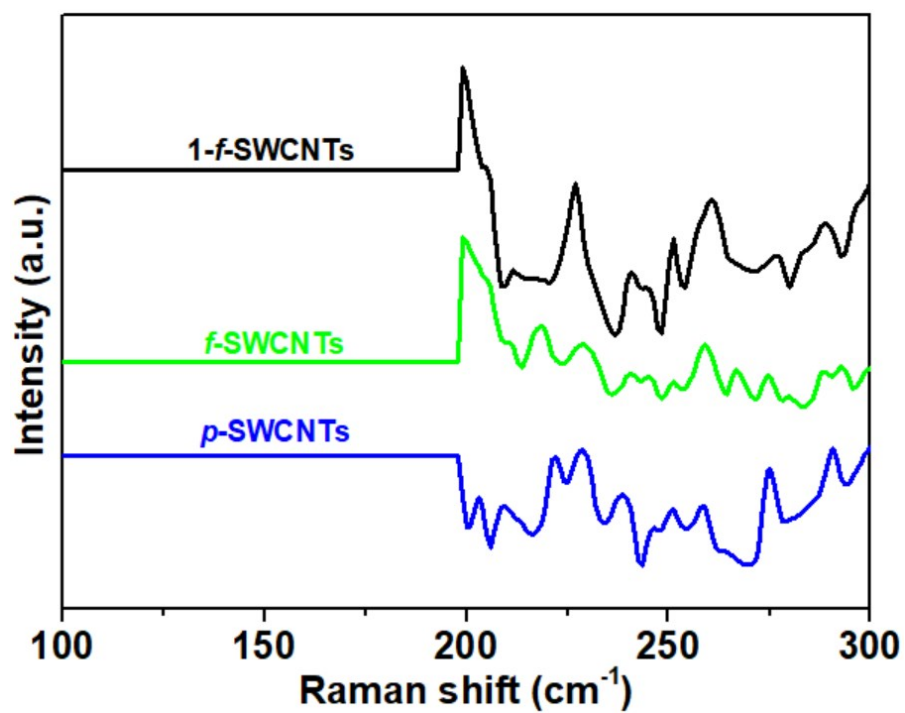

**Fig. S2.** Raman spectra (RBM region) of 1-*f*-SWCNTs (black line), *f*-SWCNTs (green line), and *p*-SWCNTs (blue line) at an excitation wavelength of 785 nm.

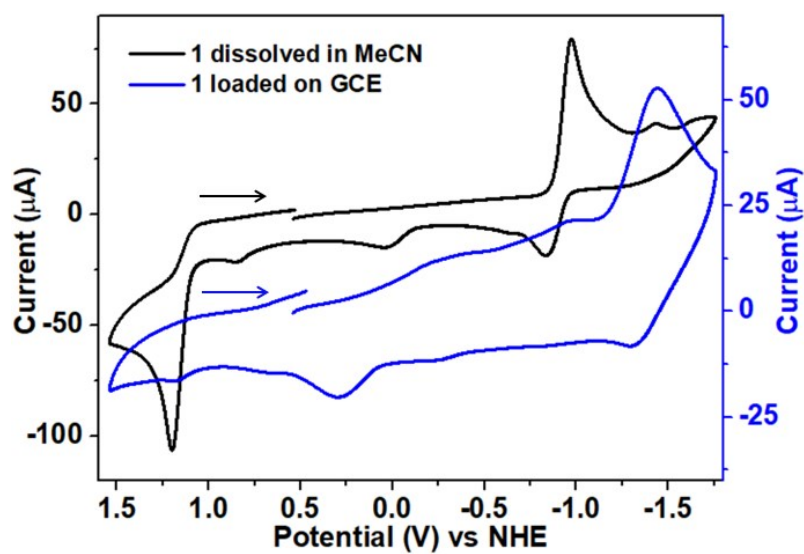

**Fig. S3.** Cyclic voltammetries of diiron compound **1** dissolved in MeCN (1.0 mM, black line) and loaded on GCE electrode (0.71 mg cm<sup>-2</sup> loading, blue line) in 0.1 M *n*-Bu<sub>4</sub>NPF<sub>6</sub>/MeCN solution at a scan rate of 0.05 V s<sup>-1</sup>. Data in MeCN were recorded using a nonaqueous Ag/AgNO<sub>3</sub> (0.01 M in MeCN) reference electrode and are further referred to the normal hydrogen electrode (NHE) for comparison.

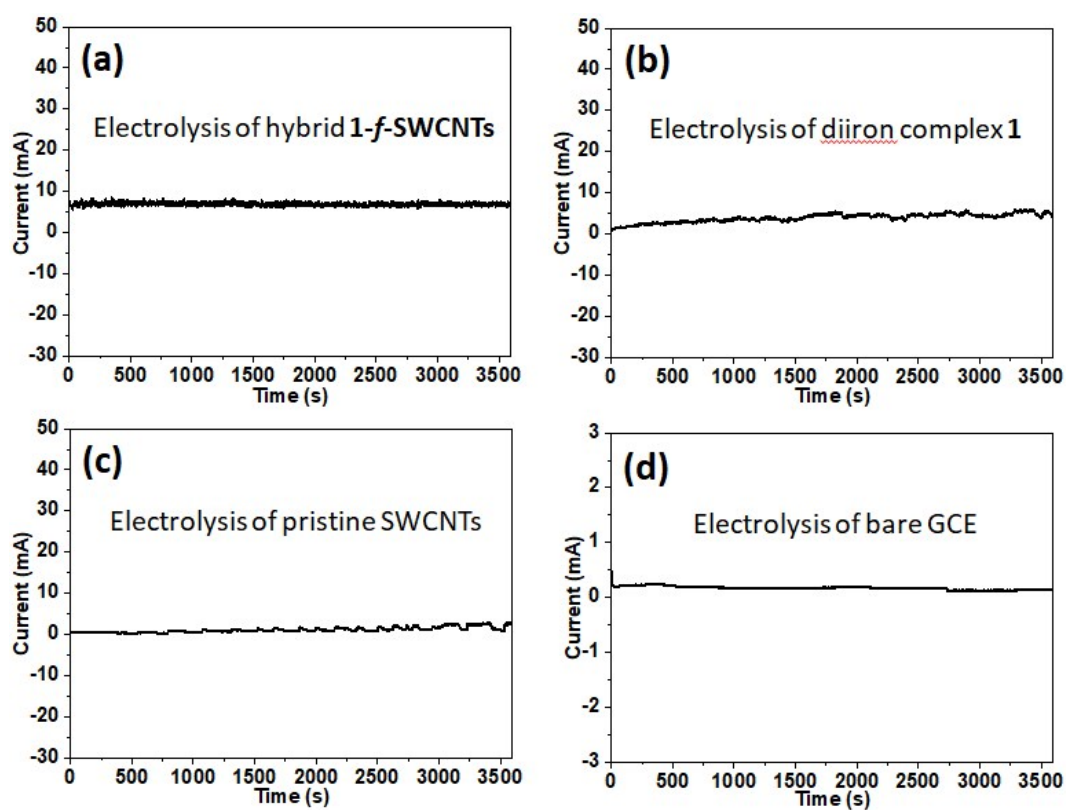

**Fig. S4.** Controlled-potential electrolysis experiments of (a) hybrid **1-f**-SWCNTs, (b) compound **1**, (c) pristine SWCNTs absorbed respectively on GCE electrodes with loading of  $0.71 \text{ mg cm}^{-2}$  and (d) bare GCE electrode at  $-0.90 \text{ V}$  vs.  $\text{Ag/AgCl}$  (sat.  $\text{KCl}$ ) in  $0.2 \text{ N H}_2\text{SO}_4$  solution.

## II. TON and TOF calculations of materials 1-f-SWCNTs and 1

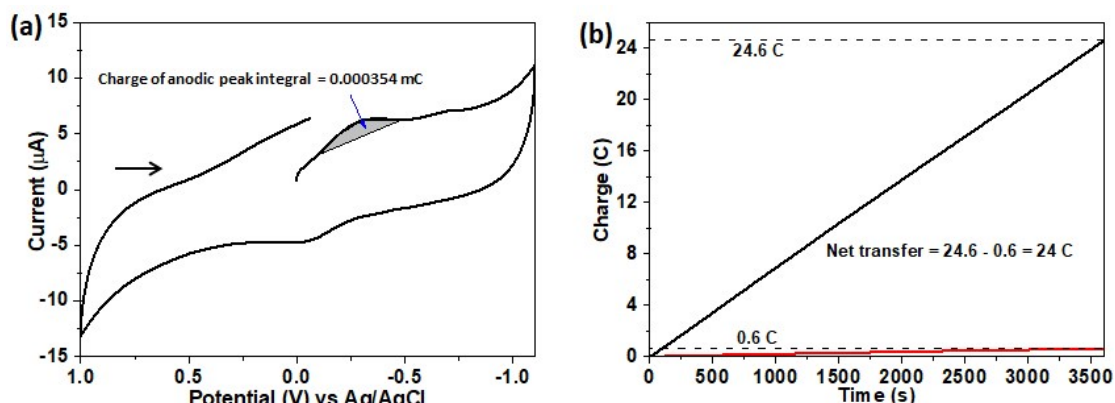

**Fig. S5.** (a) Cyclic voltammetry of hybrid **1-f-SWCNTs** (loading of  $0.71 \text{ mg cm}^{-2}$ ) absorbed on GCE electrode in  $0.1 \text{ M Na}_2\text{SO}_4/\text{H}_2\text{O}$  at a scan rate of  $0.05 \text{ V s}^{-1}$ . (b) Controlled potential electrolysis of hybrid **1-f-SWCNTs** (loading of  $0.71 \text{ mg cm}^{-2}$ ) absorbed on GCE electrode and bare GCE electrode at  $-0.9 \text{ V}$  vs Ag/AgCl (sat. KCl) in  $0.2 \text{ N H}_2\text{SO}_4$  solution.

TON and TOF calculation for the **1-f-SWCNTs** hybrid [1-4]:

- (1) From the CV curve shown in Fig. S4a, the charge of anodic peak integral is estimated to  $3.54 \times 10^{-7} \text{ C}$ . Thus, we converted this charge to the moles of catalyst **1-f-SWCNTs** on the GCE electrode (division by faraday constant), *i.e.*,  $n(\text{catalyst}) = Q/(F \times 1) = 3.54 \times 10^{-7} \text{ C}/96500 \text{ C} \cdot \text{mol}^{-1} = 0.37 \times 10^{-11} \text{ mol}$ .
- (2) From the CPE experiment shown in Fig. S4b, the neat charge passed on the **1-f-SWCNTs/GCE** electrode is equal to  $24 \text{ C}$  with  $1 \text{ hour}$ . Thus, we converted this charge to the moles of transfer electron on the GCE electrode (division by faraday constant), *i.e.*,  $n(e^-) = Q/F = 24 \text{ C}/96500 \text{ C} \cdot \text{mol}^{-1} = 2.48 \times 10^{-4} \text{ mol}$ . According to the reaction  $2\text{H}^+ + 2e^- = \text{H}_2$ , the moles of  $\text{H}_2$  produced is estimated from the moles of transfer electron on the GCE electrode (division by 2), *i.e.*,  $n(\text{H}_2) = n(e^-)/2 = 2.48 \times 10^{-4} \text{ mol}/2 = 1.24 \times 10^{-4} \text{ mol}$ .
- (3) According to the equations:  $\text{TON} = n(\text{H}_2)/n(\text{catalyst})$  and  $\text{TOF} = \text{TON}/t$ , the TON for hybrid **1-f-SWCNTs** is estimated to be  $\sim 3.4 \times 10^7$  after  $1 \text{ h}$  and thus the TOF value is  $9444 \text{ s}^{-1}$ .

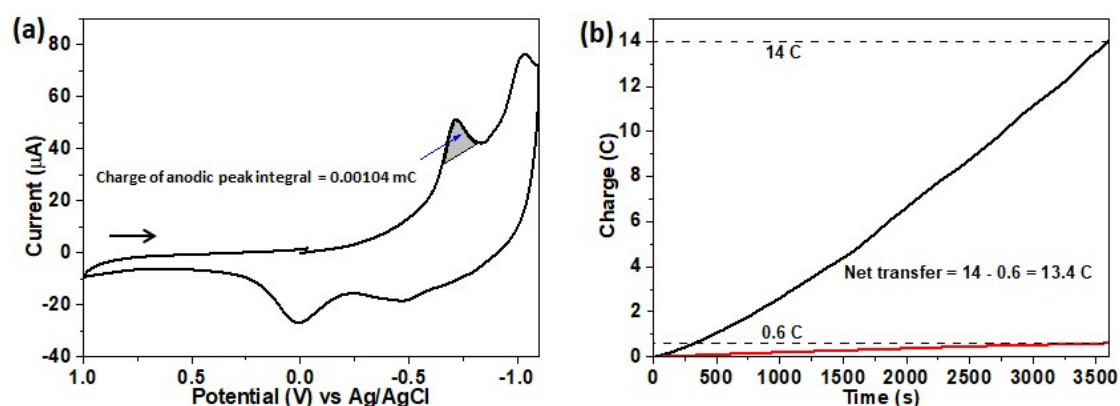

**Fig. S6.** (a) Cyclic voltammetry of compound **1** (loading of  $0.71 \text{ mg cm}^{-2}$ ) absorbed on GCE electrode in  $0.1 \text{ M Na}_2\text{SO}_4/\text{H}_2\text{O}$  at a scan rate of  $0.05 \text{ V s}^{-1}$ . (b) Controlled potential electrolysis of compound **1** (loading of  $0.71 \text{ mg cm}^{-2}$ ) absorbed on GCE electrode and bare GCE electrode at  $-0.9 \text{ V vs Ag/AgCl (sat. KCl)}$  in  $0.2 \text{ N H}_2\text{SO}_4$  solution.

TON and TOF calculation for compound **1** [1-4]:

- (1) From the CV curve shown in Fig. S5a, the charge of anodic peak integral is estimated to  $1.04 \times 10^{-6} \text{ C}$ . Thus, we converted this charge to the moles of catalyst **1** on the GCE electrode (division by faraday constant), *i.e.*,  $n(\text{catalyst}) = Q/(F \times 1) = 1.04 \times 10^{-6} \text{ C} / 96500 \text{ C} \cdot \text{mol}^{-1} = 1.08 \times 10^{-11} \text{ mol}$ .
- (2) From the CPE experiment shown in Fig. S5b, the neat charge passed on the **1** /GCE electrode is equal to  $13.4 \text{ C}$  with 1 hour. Thus, we converted this charge to the moles of transfer electron on the GCE electrode (division by faraday constant), *i.e.*,  $n(e^-) = Q/F = 13.4 \text{ C} / 96500 \text{ C} \cdot \text{mol}^{-1} = 1.39 \times 10^{-4} \text{ mol}$ . According to the reaction  $2\text{H}^+ + 2e^- = \text{H}_2$ , the moles of  $\text{H}_2$  produced is estimated from the moles of transfer electron on the GCE electrode (division by 2), *i.e.*,  $n(\text{H}_2) = n(e^-)/2 = 1.39 \times 10^{-4} \text{ mol} / 2 = 0.70 \times 10^{-4} \text{ mol}$ .
- (3) According to the equations:  $\text{TON} = n(\text{H}_2)/n(\text{catalyst})$  and  $\text{TOF} = \text{TON}/t$ , the TON for complex **1** is estimated to be  $\sim 0.6 \times 10^7$  after 1h and thus the TOF value is  $1667 \text{ s}^{-1}$ .

## References:

- [1] A. Le Goff, V. Artero, B. Jousselme, P. D. Tran, N. Guillet, R. Métayé, A. Fihri, S. Palacin and M. Fontecave, From hydrogenases to noble metal-free catalytic nanomaterials for H<sub>2</sub> production and uptake, *Science*, 2009, **326**, 1384–1387.
- [2] A. L. Goff, F. Moggia, N. Debou, P. Jegou, V. Artero, M. Fontecave, B. Jousselme and S. Palacin, Facile and tunable functionalization of carbon nanotube electrodes with ferrocene by covalent coupling and  $\pi$ -stacking interactions and their relevance to glucose bio-sensing, *J. Electroanal. Chem.*, 2010, **641**, 57–63.
- [3] S. Dey, A. Rana, S. G. Dey and A. Dey, Electrochemical hydrogen Production in acidic water by an azadithiolate bridged synthetic hydrogenase mimic: Role of aqueous solvation in lowering overpotential, *ACS Catal.*, 2013, **3**, 429–436.
- [4] M. E. Ahmed, S. Dey, B. Mondal and A. Dey, H<sub>2</sub> Evolution catalyzed by FeFe-hydrogenase synthetic model covalently attached to graphite surface, *Chem. Commun.*, 2017, **53**, 8188–8191.

### III. Crystallographic and spectroscopic data of compound 1

**Table S1.** Details of crystallographic data and structure refinement for compound 1

| Identification code                         | Compound 1                                                                                          |
|---------------------------------------------|-----------------------------------------------------------------------------------------------------|
| CCDC number                                 | 2044503                                                                                             |
| Empirical formula                           | C <sub>16</sub> H <sub>13</sub> Fe <sub>2</sub> NO <sub>7</sub> S <sub>2</sub> ·0.5H <sub>2</sub> O |
| Formula weight                              | 516.12                                                                                              |
| Temperature /K                              | 150(2)                                                                                              |
| Crystal system                              | orthorhombic                                                                                        |
| Space group                                 | Pbcn                                                                                                |
| a /Å                                        | 28.3033(7)                                                                                          |
| b /Å                                        | 10.6482(3)                                                                                          |
| c /Å                                        | 13.0200(4)                                                                                          |
| $\alpha$ /°                                 | 90                                                                                                  |
| $\beta$ /°                                  | 90                                                                                                  |
| $\gamma$ /°                                 | 90                                                                                                  |
| Volume /Å <sup>3</sup>                      | 3923.95(19)                                                                                         |
| Z                                           | 8                                                                                                   |
| $\rho_{\text{calc}}$ /g cm <sup>-3</sup>    | 1.747                                                                                               |
| $\mu$ /mm <sup>-1</sup>                     | 14.239                                                                                              |
| F(000)                                      | 2088.0                                                                                              |
| Crystal size/mm <sup>3</sup>                | 0.18 × 0.17 × 0.16                                                                                  |
| Radiation                                   | CuK $\alpha$ ( $\lambda$ = 1.54178)                                                                 |
| 2 $\theta$ range for data collection /°     | 8.872 to 132                                                                                        |
| Index ranges                                | -17 ≤ h ≤ 33,<br>-12 ≤ k ≤ 12,<br>-15 ≤ l ≤ 11                                                      |
| Reflections collected                       | 8004                                                                                                |
| Independent reflections                     | 3401 [R <sub>int</sub> = 0.0919, R <sub>sigma</sub> = 0.1167]                                       |
| Data/restraints/parameters                  | 3401/15/258                                                                                         |
| Goodness-of-fit on F <sup>2</sup>           | 1.038                                                                                               |
| Final R indexes [I ≥ 2 $\sigma$ (I)]        | R <sub>1</sub> = 0.0853, wR <sub>2</sub> = 0.2154                                                   |
| Final R indexes [all data]                  | R <sub>1</sub> = 0.1120, wR <sub>2</sub> = 0.2442                                                   |
| Largest diff. peak/hole / e Å <sup>-3</sup> | 1.57/-1.12                                                                                          |

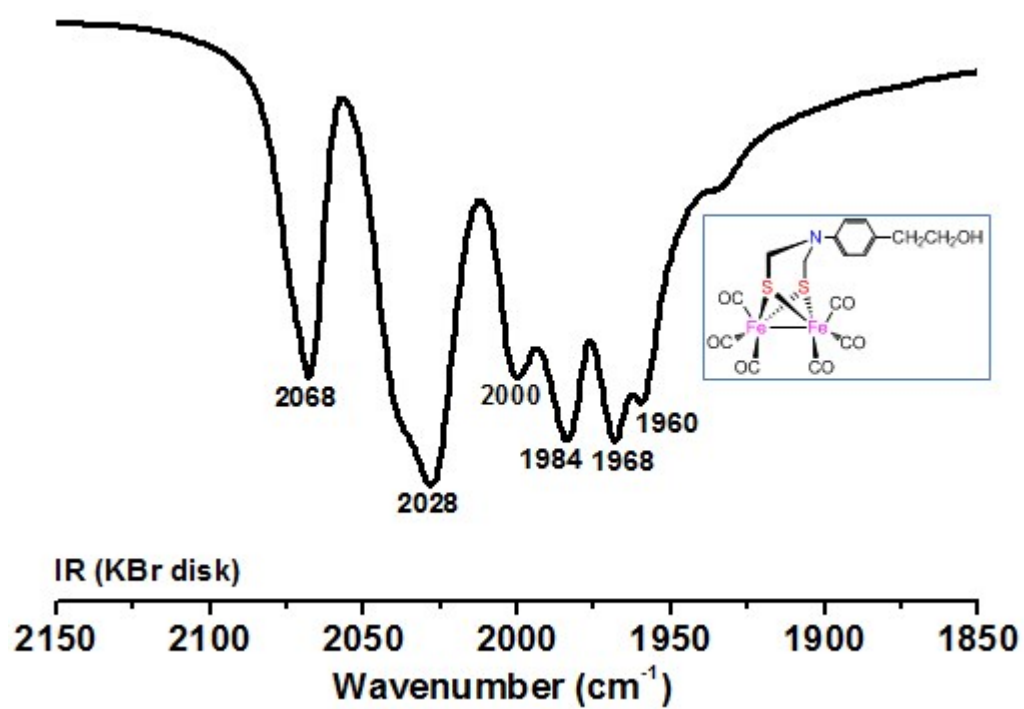

**Fig. S7.** FT-IR spectrum (KBr disk) of compound **1**.

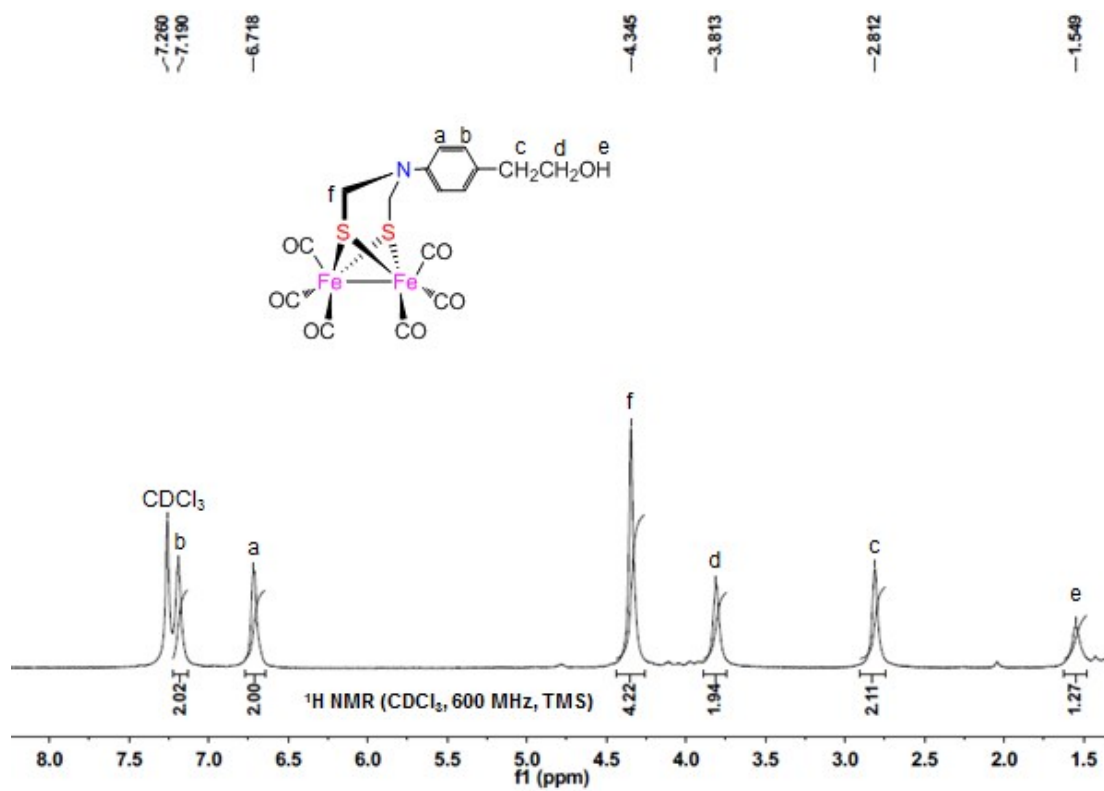

**Fig. S8.**  $^1\text{H}$  NMR (600 MHz,  $\text{CDCl}_3$ , 25°C) spectrum of compound **1**.

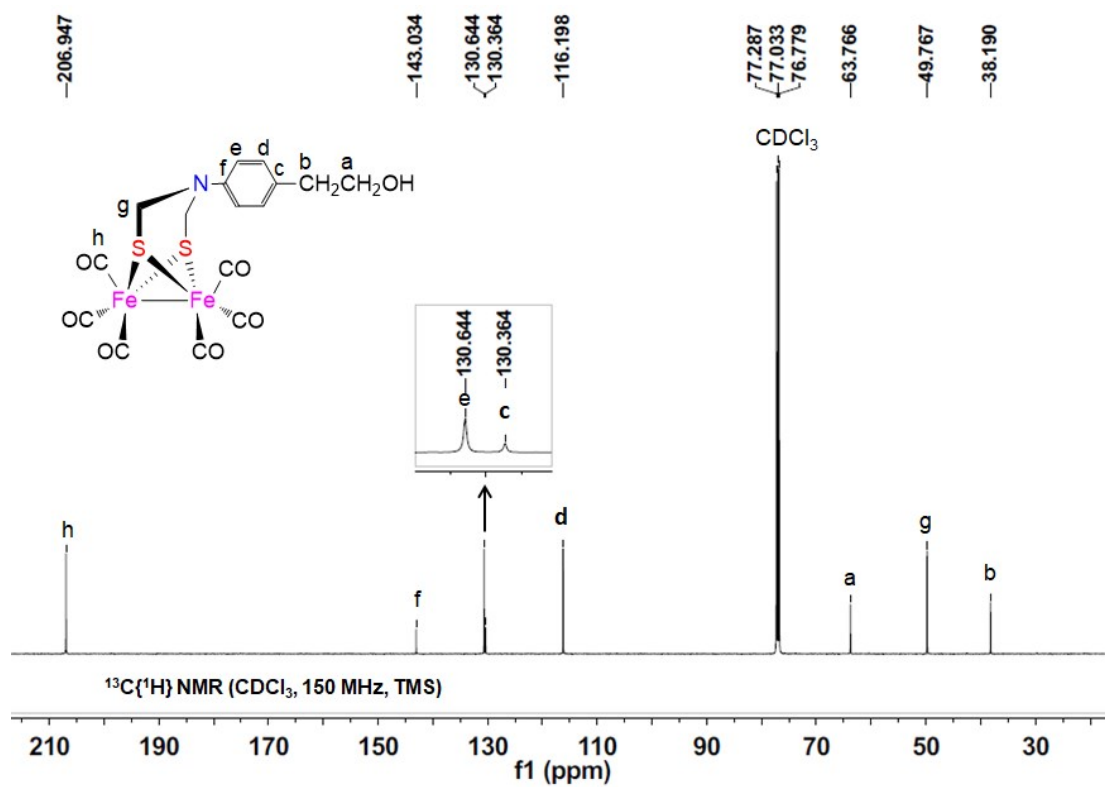

**Fig. S9.** <sup>13</sup>C{<sup>1</sup>H} NMR (150 MHz, CDCl<sub>3</sub>, 25°C) spectrum of compound 1.
